# Supplementary material for: A Systematic Review of Global Drivers of Ant Elevational Diversity
Source: PubMed Central journal article supplement (PMC4866765; doi:10.1371/journal.pone.0155404), 2016-05-13
Supplement: pone.0155404.s002.pdf [file pone.0155404.s002.pdf]

**S1 Table. Details and references of ant elevational gradients used in analyses.** List of robust and informative elevational gradients in ant species richness. Each denoted by study site (reference), diversity pattern (D: decreasing; LP: low-plateau; MP: mid-peak), data scale (L: local; R: regional), survey methods (B: baited traps, F: canopy or bark fogging; H: hand collection; L: litter sifting; M: malaise traps; P: pitfall traps; R: museum records), latitude, mountain base climate, % of gradient sampled, meters unsampled at mountain base, mountain height (m), temperature  $r^2$  values, MDE diversity and range  $r^2$  values, species-area  $r^2$  values, best fit EGCM environmental model, EGCM environmental model  $r^2$  values, EGCM simulation  $r^2$  values, and total number of species and genera on gradient.

| Study Site (Reference)                                 | Div. Pattern | Scale | Survey Methods | Lat.  | Climate | % Grad. | Unsamp. base (m) | Mtn Hgt (m) | Temp $r^2$ | MDE Div. $r^2$ | MDE Rng $r^2$ | Area $r^2$ | EGCM best mod | EGCM Env. $r^2$ | EGCM Sim. $r^2$ | Species (Genera) |
|--------------------------------------------------------|--------------|-------|----------------|-------|---------|---------|------------------|-------------|------------|----------------|---------------|------------|---------------|-----------------|-----------------|------------------|
| Soutpansberg, South Africa (Munyai & Foord 2012)       | D            | L     | P              | -23.0 | Arid    | 72.3    | 106              | 938         | 0.745      | ---            | ---           | 0.887      | ---           | ---             | ---             | 78 (28)          |
| Utah, USA (Allred 1982)                                | MP           | R     | H              | 39.5  | Arid    | 78.9    | 52               | 3459        | 0.149      | 0.111          | 0.080         | 0.509      | ATP           | 0.698           | 0.969           | 121 (23)         |
| Colorado, USA (Gregg 1963)                             | MP           | R     | H              | 39.0  | Arid    | 95.1    | 49               | 3367        | 0.492      | 0.162          | 0.027         | 0.809      | AT            | 0.326           | 0.978           | 149 (40)         |
| Nevada, USA (Wheeler & Wheeler 1986)                   | MP           | R     | H, R           | 38.5  | Arid    | 92.8    | 9                | 3835        | 0.000      | 0.896          | 0.174         | 0.900      | AT            | 0.981           | 0.975           | 157 (28)         |
| W. Texas, USA**                                        | MP           | R     | B, H, L, R     | 32.8  | Arid    | 92.1    | 0                | 2498        | 0.148      | 0.379          | 0.353         | 0.907      | AP            | 0.981           | 0.975           | 149 (35)         |
| Chisos Mtns, TX, USA (Van Pelt 1983)                   | MP           | R     | B, H, L, R     | 29.3  | Arid    | 76.2    | 348              | 1706        | 0.007      | 0.406          | 0.417         | 0.002      | TP            | 0.855           | 0.968           | 81 (29)          |
| Soutpansberg, South Africa (Munyai & Foord 2012)       | MP           | L     | P              | -23.0 | Arid    | 83.4    | 142              | 1067        | 0.141      | ---            | ---           | 0.563      | ---           | ---             | ---             | 78 (28)          |
| Cederburg Wilderness, South Africa (Botes et al. 2006) | MP           | L     | P              | -32.4 | Arid    | 97.8    | 5                | 1964        | 0.000      | ---            | ---           | 0.004      | ---           | ---             | ---             | 85 (24)          |
| Montenegro (Karaman 2011)                              | D            | R     | H              | 42.3  | Wet     | 77.5    | 100              | 2194        | 0.928      | 0.070          | 0.455         | 0.767      | T             | 0.794           | 0.283           | 87 (28)          |
| McPherson Range, Australia (Burwell & Nakamura 2011)   | D            | L     | F, H, L        | -28.2 | Wet     | 66.9*   | 300              | 1196        | 0.749      | 0.651          | 0.556         | 0.806      | A             | 0.777           | 0.970           | 169 (57)         |
| Voralberg, Austria (Glaser 2006)                       | LP           | R     | R              | 47.3  | Wet     | 59.6*   | 12               | 2853        | 0.851      | 0.405          | 0.618         | 0.110      | T             | 0.909           | 0.197           | 65 (17)          |
| Volcan Barva, Costa Rica (Longino & Colwell 2011)      | LP           | L     | L              | 10.3  | Wet     | 67.3*   | 50               | 2897        | 0.826      | 0.711          | 0.880         | 0.487      | P             | 0.719           | 0.682           | 401 (70)         |
| Espinhaco, Brazil (Araujo & Fernandes 2003)            | LP           | L     | B, H           | -19.4 | Wet     | 56.4*   | 322              | 1241        | 0.775      | 0.950          | 0.406         | 0.773      | T             | 0.982           | 0.961           | 39 (15)          |
| South Tirol, Italy (Hellrigl 2003)                     | MP           | R     | H, R           | 46.8  | Wet     | 62.6*   | 9                | 3674        | 0.029      | 0.068          | 0.203         | 0.194      | T             | 0.189           | 0.922           | 70 (24)          |
| Smoky Mtns, TN, USA (Lessard et al. 2007)              | MP           | L     | L, M, P        | 35.6  | Wet     | 75.4    | 161              | 1807        | 0.701      | 0.102          | 0.625         | 0.845      | ATP           | 0.727           | 0.953           | 38 (20)          |
| Mt Isarog, Philippines (Samson et al 1997)             | MP           | L     | P, H           | 13.7  | Wet     | 75.6    | 250              | 1983        | 0.593      | 0.190          | 0.368         | 0.373      | A             | 0.575           | 0.971           | 52 (20)          |
| Western Ghats, India (Sabu et al. 2008)                | MP           | L     | L              | 11.7  | Wet     | 58.1*   | 300              | 2322        | 0.205      | 0.026          | 0.811         | 0.543      | A             | 0.200           | 0.845           | 29 (18)          |
| Bocas del Toro, Panama (Olson 1994)                    | MP           | L     | L, P           | 8.8   | Wet     | 58.1*   | 300              | 2375        | 0.799      | ---            | ---           | 0.686      | ---           | ---             | ---             | 196 (-)          |
| Ambohitsitondroina, Madagascar (Fisher 1998)           | MP           | L     | L, P           | -15.1 | Wet     | 95.5    | 25               | 2053        | 0.506      | 0.177          | 0.067         | 0.684      | A             | 0.349           | 0.988           | 272 (28)         |
| Fiji (Sarnat & Economo 2012)                           | MP           | R     | ALL            | -17.7 | Wet     | 98.1    | 0                | 1324        | 0.654      | 0.359          | 0.096         | 0.850      | A             | 0.579           | 0.914           | 174 (42)         |

\* < 70% of gradient sampled, but primarily upper elevations where diversity had already decreased monotonically

\*\* Moody & Francke 1982; Cockendolpher & Francke 1990

## S1: References

---

1. Allred DM. Ants of Utah. *Gt Basin Nat.* 1982;42: 415–511.
2. Araújo LLM, Fernandes GWG. Altitudinal patterns in a tropical ant assemblage and variation in species richness between habitats. *Lundiana.* 2003;4: 103–109.
3. Botes A, McGeoch MA, Robertson HG, van Niekerk A, Davids HP, Chown SL. Ants, altitude and change in the northern Cape Floristic Region. *J Biogeogr.* 2006;33: 71–90. doi:10.1111/j.1365-2699.2005.01336.x
4. Burwell CJ, Nakamura A. Distribution of ant species along an altitudinal transect in continuous rainforest in subtropical Queensland, Australia. *Mem Queensl Museum.* 2011;55: 391–412.
5. Cokendolpher JC, Francke OF. The ants (Hymenoptera, Formicidae) of western Texas. Part II. Subfamilies Ecitoninae, Ponerinae, Pseudomyrmecinae, Dolichoderinae, and Formicinae. *Spec Publ Mus Tex Tech Univ.* Lubbock, TX: Texas Tech Press; 1990.
6. Fisher BL. Ant diversity patterns along an elevational gradient in the Réserve Spéciale d'Anjanaharibe-Sud and on the western Masoala Peninsula, Madagascar. *Fieldiana Zool.* 1998;90: 39–67.
7. Glaser F. Biogeography, diversity, and vertical distribution of ants (Hymenoptera: Formicidae) in Vorarlberg, Austria. *Myrmecological News.* 2006;8: 263–270.
8. Gregg RE. *The Ants of Colorado.* Univ. of Colorado Press. Boulder, Colorado, xvi. Denver, CO: University of Colorado Press; 1963.
9. Hellrigl K. Faunistik der Ameisen und Wildbienen Südtirols (Hymenoptera: Formicidae et Apoidea). *Gredleriana.* 2003;3: 143–208.
10. Karaman MG. Zoogeography, diversity and altitudinal distribution of ants (Hymenoptera: Formicidae) in the Mediterranean and the oro-Mediterranean parts of Montenegro. *North West J Zool.* 2011;7: 26–34.
11. Lessard JJP, Dunn RRR, Parker CCR, Sanders NNJ. Rarity and diversity in forest ant assemblages of Great Smoky Mountains National Park. *Southeast Nat.* 2007;0: 215–228.
12. Longino JT, Colwell RK. Density compensation, species composition, and richness of ants on a neotropical elevational gradient. *Ecosphere.* 2011;2: art29. doi:10.1890/ES10-00200.1
13. Moody JV, Francke OF. The ants (Hymenoptera, Formicidae) of western Texas Part I. Subfamily Myrmicinae. Lubbock, TX: Texas Tech Press; 1982.
14. Munyai TC, Foord SH. Ants on a mountain: spatial, environmental and habitat associations along an altitudinal transect in a centre of endemism. *J Insect Conserv.* 2012;16: 677–695. doi:10.1007/s10841-011-9449-9
15. Olson DM. The distribution of leaf litter invertebrates along a neotropical altitudinal gradient. *J Trop Ecol.* 1994;10: 129–150.
16. Sabu TK, Vineesh P, Vinod K. Diversity of forest litter-inhabiting ants along elevations in the Wayanad region of the Western Ghats. *J Insect Sci.* 2008;8: 1–14.
17. Samson DA, Rickart EA, Gonzales PC. Ant diversity and abundance along an elevational gradient in the Philippines. *Biotropica.* 1997;29: 349–363.
18. Sarnat E, Economo E. *The ants of Fiji.* Berkeley and Los Angeles, CA: UC Publications in Entomology, University of California Press; 2012.
19. Van Pelt A. *Southwestern Association of Naturalists Ants of the Chisos Mountains, Texas (Hymenoptera: Formicidae).* *Southwest Nat.* 1983;28: 137–142.
20. Wheeler G, Wheeler J. *The ants of Nevada.* Los Angeles, CA: Natural History Museum of Los Angeles County; 1986.
