# Supplementary material for: A Systematic Review of Global Drivers of Ant Elevational Diversity
Source: PubMed Central journal article supplement (PMC4866765; doi:10.1371/journal.pone.0155404), 2016-05-13
Supplement: pone.0155404.s003.pdf [file pone.0155404.s003.pdf]

**S2 Table. Details and references of ant datasets excluded from analyses.** Datasets that were not used in analyses, including the study site (reference), the reported diversity pattern (D: decreasing; I: Increasing; LP: low-plateau; MP: mid-peak, and No Pattern), the data scale (local or regional), and the reason(s) the study was not included (D: large portion of gradient had anthropogenic disturbance; G: sampling gaps between sites were >500m; I: insufficient or no elevational diversity data; L: no sampling in the lowest 400m; M: multiple gradients or sites too far apart; P: <70% of elevational gradient sampled and not primarily upper elevations where diversity had already decreased monotonically; R: repeated data or non-independent transect; S: sampling effort minimal or biased elevationally).

| Study Site (Reference)                                             | Reported Pattern | Scale    | Exclusion Reason |
|--------------------------------------------------------------------|------------------|----------|------------------|
| Alps, Tirol, Austria (Kofler 1978)                                 | ---              | Regional | I                |
| Andes, Colombia (van der Hammen & Ward 2005)                       | MP               | Local    | L, S             |
| Andes, Lambayeque, Peru (Delgado et al. 2008)                      | D                | Local    | L, P, S          |
| Andes, Venezuela (Janzen 1976)                                     | LP               | Local    | G                |
| Andohahela, Madagascar (Fisher 1999)                               | MP               | Local    | P                |
| Andringitra, Madagascar (Fisher 1996)                              | D                | Local    | L, P             |
| Appalachian Mtns, NC, VA, MD; USA (McCoy 1990)                     | ---              | Local    | I                |
| Appalachian Mtns, VA, USA (Wang et al. 2001)                       | D                | Local    | I                |
| Cederburg Wilderness, South Africa (Botes et al. 2006)             | MP               | Local    | L                |
| Chiricahua Mtns, AZ, USA (Anderson 1997)                           | MP               | Local    | S                |
| Colorado, USA (Sanders 2002)                                       | MP               | Regional | R                |
| Coastal Cordillera, Venezuela (Lattke & Riera-Valera 2012)         | ---              | Local    | I, L, P          |
| Costa Rica (Janzen 1973)                                           | ---              | Local    | I, G             |
| Eastern Australia (Majer et al. 2001)                              | D                | Local    | G, M             |
| Georgia (Chaladze 2012)                                            | MP               | Regional | I                |
| Georgia, USA (Ipser et al. 2004)                                   | MP               | Regional | S                |
| Gunung Mulu, Sarawak (Collins 1980)                                | ---              | Local    | I                |
| Himalayas, India (Bharti 2008)                                     | ---              | Regional | I, L             |
| Himalayas, Jammu-Kashmir, India (Bharti & Sharma 2009)             | ---              | Local    | I, G, L, P       |
| Himalayas, Jammu-Kashmir, India (Bharti et al. 2013)               | MP               | Local    | G                |
| Imatong Mtns, Sudan (Weber 1943)                                   | ---              | Local    | I                |
| Kinabalu, Malaysia (Brühl et al. 1999)                             | D                | Local    | L, S             |
| Kinabalu, Malaysia (Malsch et al. 2008)                            | D                | Local    | L                |
| Maloti-Drakensberg, South Africa (Bishop et al. 2014)              | MP               | Local    | I                |
| Manongarivo, Madagascar (Fisher 2002)                              | LP               | Local    | S                |
| Minorca, Spain (Guillem 2009)                                      | ---              | Local    | I, P             |
| Monts Doudou, Gabon (Fisher 2004)                                  | No Pattern       | Local    | D, S             |
| Nevada, USA (Sanders 2002)                                         | MP               | Regional | R                |
| Northeastern USA (Del Toro 2013)                                   | ---              | Local    | M                |
| Okinawa, Japan (Ito et al. 1998)                                   | ---              | Local    | I, P, S          |
| Shoshone Mtns, NV, USA (MontBlanc et al. 2007)                     | MP               | Local    | L, P             |
| Sierra Nevada de Santa Marta, Colombia (Guerrero & Sarmiento 2010) | D                | Local    | L, P             |
| Smoky Mtns, TN, USA (Cole 1940)                                    | LP               | Regional | R                |
| Smoky Mtns, TN, USA (Geraghty et al. 2007)                         | D                | Local    | R                |

| Study Site (Reference)                          | Reported Pattern | Scale    | Reason for Exclusion |
|-------------------------------------------------|------------------|----------|----------------------|
| Smoky Mtns, TN, USA (Sanders et al. 2007)       | D                | Local    | R                    |
| Smoky Mtns, TN, USA (Whittaker 1952)            | ---              | Local    | I                    |
| Smoky Mtns, TN, USA (Zelikova et al. 2008)      | D                | Local    | I, R                 |
| South Korea (Kwon et al. 2014)                  | D                | Local    | S                    |
| South Sinai, Egypt (Orabi et al. 2011)          | No Pattern       | Local    | G                    |
| South Tirol, Italy (Glaser 2008)                | ---              | Regional | I                    |
| Spring Mtns, NV, USA (Sanders 2003)             | I                | Local    | P                    |
| Spring Mtns, NV, USA (Sanders 2003)             | I                | Local    | P                    |
| Spring Mtns, NV, USA (Sanders 2003)             | MP               | Local    | P                    |
| Tatra Mtns, Poland (Woyciechowski 1993)         | ---              | Local    | I, L, P              |
| Utah, USA (Sanders 2002)                        | MP               | Regional | R                    |
| Volcan Barva, Costa Rica (Atkin & Proctor 1988) | ---              | Local    | I                    |
| Volcan Barva, Costa Rica (Colwell et al. 2008)  | LP               | Local    | R                    |

## S2: References

- Andersen AN. Functional groups and patterns of organization in North American ant communities: a comparison with Australia. *J Biogeogr.* 1997;24: 433–460.
- Atkin L, Proctor J. Invertebrates in the litter and soil on Volcan Barva, Costa Rica. *J Trop Ecol.* 1988;4: 307–310.
- Bharti H. Altitudinal diversity of ants in Himalayan regions (Hymenoptera: Formicidae). *Sociobiology.* 2008;52: 305–322.
- Bharti H, Sharma YP. Diversity and abundance of ants along an elevational gradient in Jammu-Kashmir Himalaya-I. *Halteres.* 2009;1: 10–24.
- Bharti H, Sharma YP, Bharti M, Pfeiffer M. Ant species richness, endemism and functional groups, along an elevational gradient in the Himalayas. *Asian Myrmecology.* 2013;5: 79–101.
- Bishop TR, Robertson MP, van Rensburg BJ, Parr CL. Elevation-diversity patterns through space and time: Ant communities of the Maloti-Drakensberg Mountains of southern Africa. Gillman L, editor. *Journal of Biogeography.* 24 Jun 2014: 1–13. doi:10.1111/jbi.12368
- Brühl CA, Mohamed M, Linsenmair KE. Altitudinal distribution of leaf litter ants along a transect in primary forests on Mount Kinabalu, Sabah, Malaysia. *J Trop Ecol.* 1999;15: 265–277.
- Castro Delgado S, Vergara Cobian C, Arellano Ugarte C. Distribucion de la riqueza, composicion taxonomica y grupos funcionales de hormigas del suelo a lo largo de un gradiente altitudinal en el Refugio de Vida Silvestre Laquipampa, Lambayeque - Peru. *Ecol Apl.* 2008;7: 89–103.
- Chaladze G. Climate-based model of spatial pattern of the species richness of ants in Georgia. *J Insect Conserv.* 2012;16: 791–800. doi:10.1007/s10841-012-9464-5
- Cole A. A guide to the ants of the Great Smoky Mountains National Park, Tennessee. *Am Midl Nat.* 1940;24: 1–88.
- Collins N. The distribution of soil macrofauna on the west ridge of Gunung (Mount) Mulu, Sarawak. *Oecologia.* 1980;44: 263–275.
- Colwell RK, Brehm G, Cardelús CL. Global warming, elevational range shifts, and lowland biotic attrition in the wet tropics. *Science (80- ).* 2008;322: 258–261.

13. Del Toro I. Diversity of Eastern North American ant communities along environmental gradients. *PLoS One*. 2013;8: e67973. doi:10.1371/journal.pone.0067973
14. Fisher BL. Ant diversity patterns along an elevational gradient in the Réserve Naturelle Intégrale d'Andringitra, Madagascar. *Fieldiana Zool*. 1996;85: 93–108.
15. Fisher BL. Ant diversity patterns along an elevational gradient in the Réserve Spéciale de Manongarivo, Madagascar. *Boissiera*. 2002;59: 311–328.
16. Fisher BLBBL. Diversity patterns of ants (Hymenoptera: Formicidae) along an elevational gradient on Monts Doudou in Southwestern Gabon. *Calif Acad Sci Mem*. 2004;28: 269–286.
17. Geraghty MJ, Dunn RR, Sanders NJ. Body size, colony size, and range size in ants (Hymenoptera: Formicidae): are patterns along elevational and latitudinal gradients consistent with Bergmann's rule. *Myrmecological News*. 2007;10: 51–58.
18. Glaser F. Die Ameisenfauna (Hymenoptera, Formicidae) des Schlerngebiets (Italien, Südtirol). *Gredleriana*. 2008;8: 467–496.
19. Guerrero RJ, Sarmiento CE. Distribucion altitudinal de hormigas (Hymenoptera, Formicidae) en la vertiente noroccidental de la Sierra Nevada de Santa Marta (Colombia). *Acta Zool Mex*. 2010;26: 279–302.
20. Guillem R. A survey of the ants of Minorca (Hymenoptera: Formicidae) with two new species for the island: *Hypoponera punctatissima* (Roger, 1859) and *Temnothorax algiricus* (Forel, 1894). *Boletín la Asoc Española Entomol*. 2009;33: 447–460.
21. Ipers RM, Brinkman MA, Gardner WA, Peeler HB. A survey of ground-dwelling ants (Hymenoptera: Formicidae) in Georgia. *Florida Entomol*. 2004;87: 253–260.
22. Ito Y, Takamine H, Yamauchi K. Abundance and species diversity of ants in forests of Yanbaru, the Northern Part of Okinawa Honto with special reference to effects of undergrowth removal. *Entomol Sci*. 1998;1: 347–355.
23. Janzen D. Sweep samples of tropical foliage insects: Description of study sites , with data on species abundances and size distributions. *Ecology*. 1973;54: 659–686.
24. Janzen D, Ataroff M, Farinas M, Reyes S. Changes in the arthropod community along an elevational transect in the Venezuelan Andes. *Biotropica*. 1976;8: 193–203.
25. Kofler A. Faunistik der Ameisen (Insecta: Hymenoptera, Formicoidea) Osttirols (Tirol, Österreich). *Ber nat-med Verein Innsbruck*. 1978; 117–128.
26. Kwon T-S, Kim S-S, Chun JH. Pattern of ant diversity in Korea: An empirical test of Rapoport's altitudinal rule. *Journal of Asia-Pacific Entomology*. Elsevier B.V.; 2014. doi:10.1016/j.aspen.2013.12.006
27. Lapolla JS, Suman T, Sosa-Calvo J, Schultz TR. Leaf litter ant diversity in Guyana. *Biodivers Conserv*. 2007;16: 491–510. doi:10.1007/s10531-005-6229-4
28. Lattke JE, Riera-valera MA. Diversidad de hormigas (Hymenoptera: Formicidae) en la hojarasca y suelo de selvas nubladas de la Cordillera de la Costa, Venezuela. *Metod en Ecol y Sist*. 2012;7: 20–34.
29. Majer JD, Kitching RL, Heterick BE, Hurley K. North-south patterns within arboreal ant assemblages from rain forests in eastern Australia. *Biotropica*. 2001;33: 643–661.
30. Malsch A, Fiala B, Maschwitz U, Mohamed M, Nais J, Linsenmair K. An analysis of declining ant species richness with increasing elevation at Mount Kinabalu, Sabah, Borneo. *Asian Myrmecology*. 2008;2: 33–49.
31. McCoy ED. The distribution of insects along elevational gradients. *Oikos*. 1990;58: 313–322.
32. MontBlanc EM, Chambers JC, Brussard PF. Variation in ant populations with elevation, tree cover, and fire in a pinyon-juniper-dominated watershed. *West North Am Nat*. 2007;67: 469–491.
33. Orabi GM, Semida FM, Abdel-Dayem MS, Sharaf MR, Zalat SM. Diversity patterns of ants along an elevation gradient at St. Catherine Protectorate, South Sinai, Egypt. *Zool Middle East*. 2011;54: 101–112. doi:10.1080/09397140.2011.10648882

34. Reymond A, Purcell J, Cherix D, Guisan A, Pellissier L. Functional diversity decreases with temperature in high elevation ant fauna. *Ecol Entomol.* 2013;38: 364–373. doi:10.1111/een.12027
35. Robertson HG. Comparison of leaf litter ant communities in woodlands, lowland forests and montane forests of north-eastern Tanzania. *Biodivers Conserv.* 2002;11: 1637–1652.
36. Sanders NJ. Elevational gradients in ant species richness: area, geometry, and Rapoport's rule. *Ecography (Cop).* 2002;1: 25–32.
37. Sanders NJ, Lessard J-P, Fitzpatrick MC, Dunn RR. Temperature, but not productivity or geometry, predicts elevational diversity gradients in ants across spatial grains. *Glob Ecol Biogeogr.* 2007;16: 640–649. doi:10.1111/j.1466-8238.2007.00316.x
38. Sanders NJ, Moss J, Wagner D. Patterns of ant species richness along elevational gradients in an arid ecosystem. *Glob Ecol Biogeogr.* 2003;12: 93–102. doi:10.1046/j.1466-822X.2003.00324.x
39. van der Hammen T, Ward P. Ants from the Ecoandes expeditions: diversity and distribution. *Stud Trop Andean Ecosyst.* 2005;6.
40. Wang C, Strazanac JS, Butler L. Association between ants (Hymenoptera: Formicidae) and habitat characteristics in oak-dominated mixed forests. *Environ Entomol.* 2001;30: 842–848.
41. Weber NA. The ants of the Imatong Mountains, Anglo-Egyptian Sudan. *Bull Museum Comp Zool.* 1943;93: 263–389.
42. Whittaker RH. A study of summer foliage insect communities in the Great Smoky Mountains. *Ecol Monogr.* 1952;22: 1–44.
43. Woyciechowski M. Ants (Hymenoptera, Formicidae) of the glades in the Tatra Mts (the Carpathians). *Tiscia.* 1993;27: 17–22.
44. Zelikova TJ, Dunn RR, Sanders NJ. Variation in seed dispersal along an elevational gradient in Great Smoky Mountains National Park. *Acta Oecologica.* 2008;34: 155–162. doi:10.1016/j.actao.2008.05.002
